# Supplementary material
Source: ML conference proceedings conference paper supplement (https://proceedings.neurips.cc/paper_files/paper/2019/hash/83462e22a65e7e34975bbf2b639333ec-Abstract.html)
Supplement: Supplementary file 1 [file 83462e22a65e7e34975bbf2b639333ec-Supplemental.zip]

Archive with 1 entries (1 files):
- appendix.pdf
